# Supplementary material for: Copper particle-free ink with enhanced performance for inkjet-printed flexible UWB antennas
Source: Royal Society of Chemistry journal article supplement (doi:10.1039/d3tc02515b), 2023-01-01
Supplement: d3tc02515b1.pdf [file d3tc02515b1.pdf]

## Supporting Information

### Copper particle-free ink with enhanced performance for inkjet-printed flexible UWB antennas

Wendong Yang<sup>a, b\*</sup>, Zhichao Dong<sup>a, b</sup>, Zihao Guo<sup>a, b</sup> and Haoqiang Sun<sup>a, b</sup>

*a. School of Electronic and Information Engineering, Liaoning Technical University, Huludao City, 125105, China.*

*Email: [wendong\\_2007@163.com](mailto:wendong_2007@163.com); \*corresponding author*

*b. Key Laboratory of Radio Frequency and Big Data for Intelligent Applications, Liaoning Technical University, Huludao City, 125105, China.*

#### Section 1 Antenna Design Processes

The proposed flexible UWB antenna is designed based on a monopole antenna. The following are the specific design steps of the antenna.

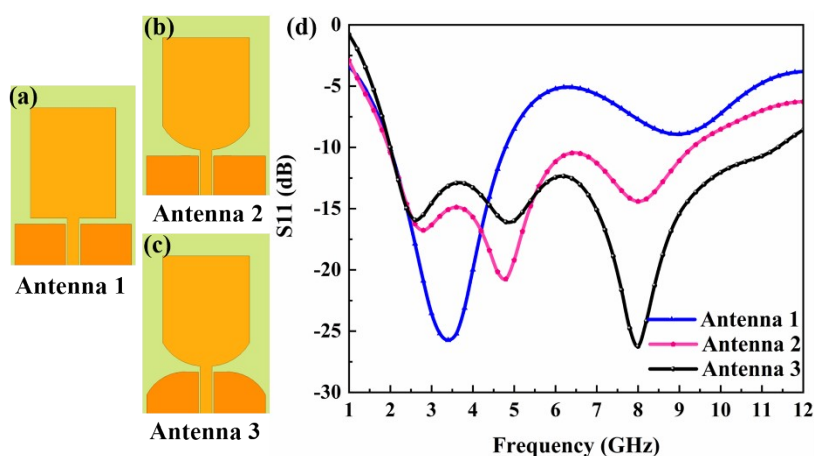

**Figure S1.** Design processes of the proposed flexible UWB antenna: (a-c) structures of Antenna 1-3, and (d) their return loss values

Step 1: Design of a conventional monopole antenna, named as Antenna 1.

In this step, a conventional monopole antenna with a minimum cutoff frequency of less than 3.1 GHz is designed using the cylinder approximation approach.<sup>1</sup> The antenna is fed by the coplanar waveguide approach and consists of a rectangular patch unit and a ground plate (Figure S1a). It has an operating bandwidth of 1.94-4.74GHz.

Step 2: Design of UWB antenna from Antenna1, named as Antenna 2.

Antenna 2 is built by doing fan-shaped gradient processing to the lower half of the radiation patch of Antenna 1 (Figure S1b), resulting in a larger bandwidth at 1.95-9.34GHz. However, the impedance matching of the Antenna 2 around 6GHz is not ideal.

Step 3: Structure optimization of Antenna 2, named as Antenna 3.

Antenna 3 is developed on the basis of Antenna 2 to further broaden the operating band for UWB, where the rectangular grounding plate of the antenna is cut into a circular arc shape and the gap size between the ground plate and the feeder is decreased (Figure 1c). As expected, the operating frequency band of the Antenna 3 is 2.0-11.39GHz, which covers the UWB band range.

#### Section 2 Optimization of Cuf ink

Inks with OA/DAP ratios ranging from 3:0 to 0:3 were formulated and named as Ink<sub>1</sub>, Ink<sub>2</sub>, Ink<sub>3</sub>, Ink<sub>4</sub> and Ink<sub>5</sub>, respectively. XRD, SEM and four-probe analyses were employed to investigate the physical phase, morphology and resistivity of the films from these inks to determine the optimal mixing

ratio; the results are given in **Figure. S2**.

Clearly, the XRD patterns of all the films exhibit a crystalline copper structure (JCPDS No. 04-0836, **Figure. S2a**), indicating that the copper-amine complex in each ink has been converted into metallic copper. **Figure. S2b** shows the resistivity data for each film. As the DAP content increases, the resistivity of the silver film decreases dramatically, however, there is an optimal ratio at which the resistance value is the lowest. **Figure S2c** shows the corresponding surface morphologies of each film on glass substrates. The surface morphology of the film from OA/DAP inks in 2:1 and 1:1 revealed a microstructure composed of copper particles with big and small sizes, where the latter was filled in the voids of the former. The film formed by the ink in 1:2 presented a microstructure consisting of larger copper nanoparticles in a good connection.

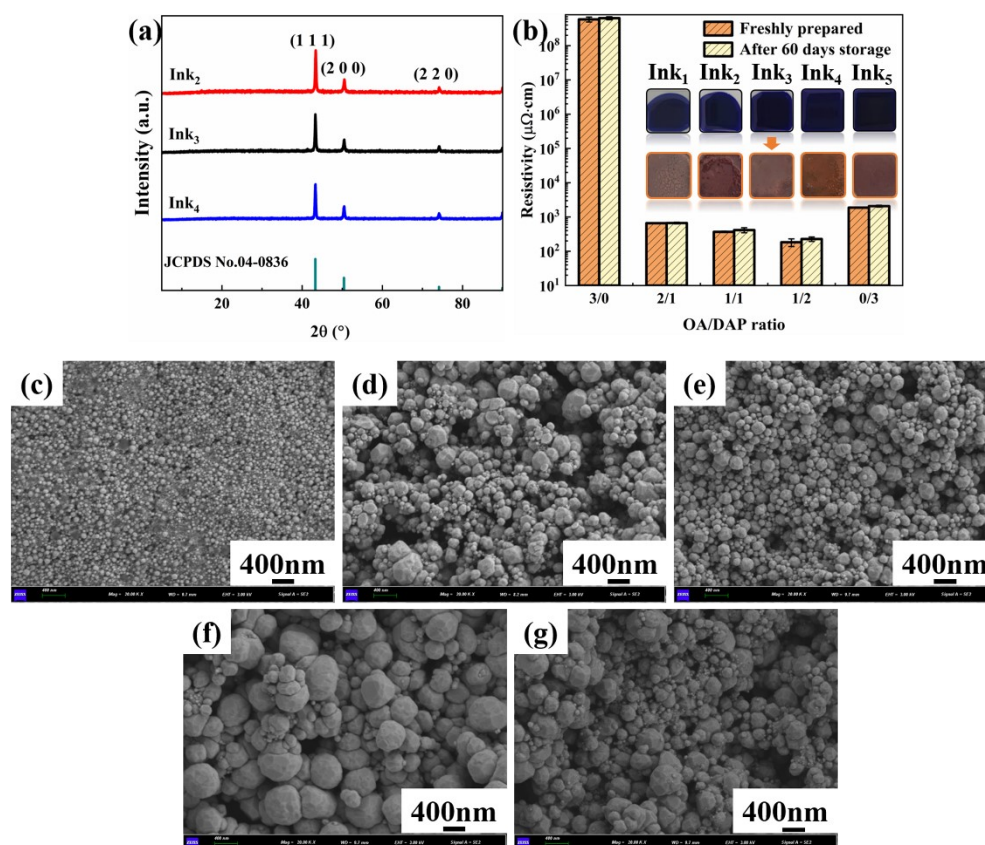

**Figure S2.** (a) XRD patterns, (b) resistivities and (c-g) surface morphologies of copper films produced at 170°C for 60 minutes from inks prepared with varied molar ratios of OA and DAP (c) 3:0, (d) 2:1, (e) 1:1, (f) 1:2 and (g) 0:3

The particle size statistics of each copper film are shown in **Figure S3**. It can be found that with the increase of the DAP content, the average particle size of the obtained copper particles becomes larger, and these particles are well connected, thus the volume resistivity of the copper film decreases. The structure differences may be associated with the activating effect and capping effect of the OA and DAP.<sup>2</sup>

Here, considering the good electrical property and film morphology will be beneficial to the performance of the subsequent antenna, we chose 1:2 as the optimal ratio to formulate the ink for the later printing.

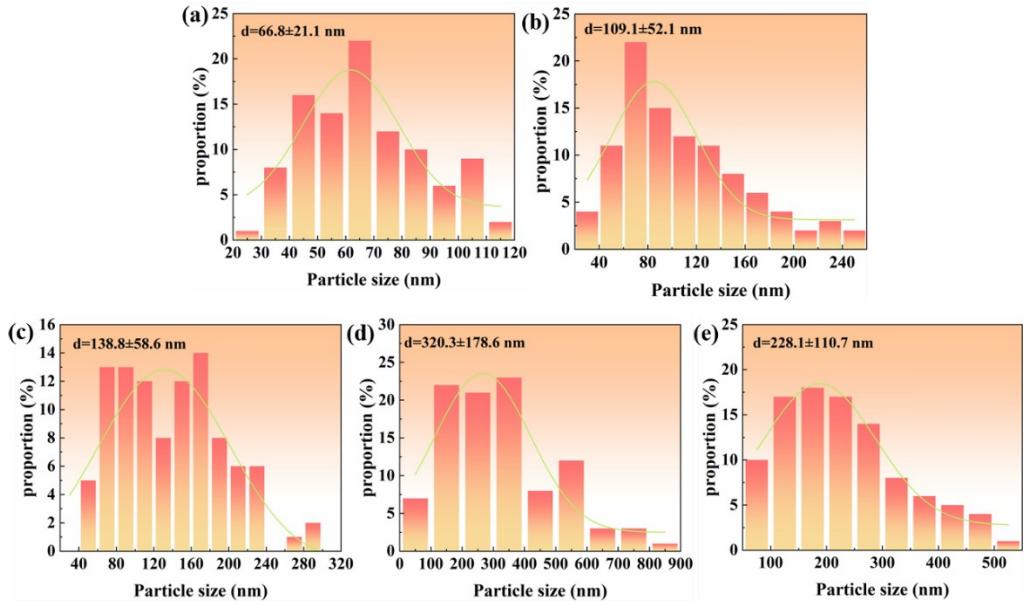

Figure S3. The corresponding particle size distributions of the copper films from Ink<sub>1</sub> to Ink<sub>5</sub>

### Section 3. Ink Stability

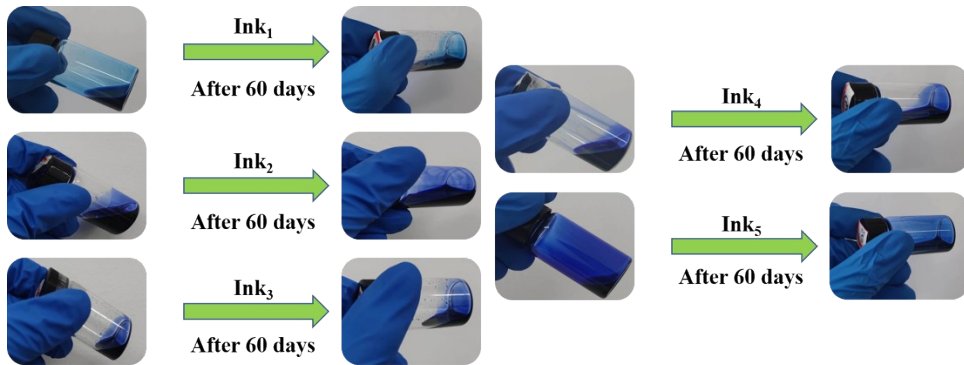

Figure S4. Photographs of Ink<sub>1</sub>-Ink<sub>5</sub> freshly prepared and stored in a fridge at 5°C for 60 days

### Section 4. Bendability of the printed antenna prototype

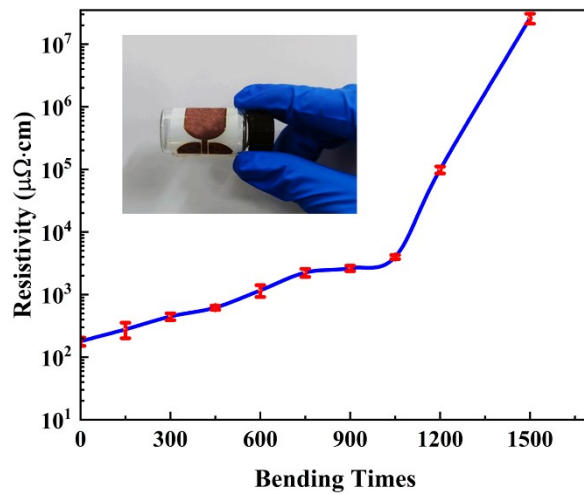

Figure S5. Bendability test of the antenna prototype

## Section 4. Ink Comparison

**Table S1** A brief overview of the reported copper-based particle-free inks

| Reference        | Ink Recipe                              |                                            |                                              | Patterning Method |                                   | Resistivity ( $\mu\Omega\cdot\text{cm}$ ) | Advantages                                                           | Disadvantages                                                                                     |
|------------------|-----------------------------------------|--------------------------------------------|----------------------------------------------|-------------------|-----------------------------------|-------------------------------------------|----------------------------------------------------------------------|---------------------------------------------------------------------------------------------------|
|                  | Copper precursor                        | Complexing agent                           | Solvent                                      | Deposition        | Metallization                     |                                           |                                                                      |                                                                                                   |
| [3]              | Copper format                           | Hexylamine and 2-amino-2-methyl-1-propanol | Isopropyl alcohol                            | Spin coating      | Laser sintering                   | 17                                        | Good conductivity, Tighter film structure                            | Not suitable for inkjet printing, 3 hours of ink preparation, and need a special sintering method |
| [4]              | Copper (II) hydroxide                   | Formic acid and citric acid                | DI water                                     | Handwriting       | Intensive Pulsed Light Sintering  | 3.21-5.27                                 | Excellent conductivity                                               | Not suitable for inkjet printing, and need a special sintering method                             |
| [5]              | Copper (II) formate tetrahydrate        | n-octyl amine                              | Toluene                                      | Squeegee coating  | 140°C for 60min, N <sub>2</sub>   | 20                                        | Good conductivity, Lower sintering temperature, Air-sinterable       | Toxic ink solvent, not suitable for inkjet printing                                               |
| [6]              | Copper (II) formate anhydrate           | 3-dimethylamino-1,2-propanediol            | /                                            | Squeegee coating  | 180 °C for 5min                   | 300                                       |                                                                      | Conductivity, not suitable for inkjet printing                                                    |
| [7]              | Copper (II) formate tetrahydrate        | 1,2-diaminopropane                         | Ethanol                                      | Drop coating      | 180 °C, 1 min                     | 18                                        | Good conductivity, Air-sinterable,                                   | Not suitable for inkjet printing                                                                  |
| [8]              | Copper (II) formate tetrahydrate        | 2-Amino-2-methyl-1-propanol                | Isopropyl alcohol                            | Drop coating      | 350 °C for 30min, N <sub>2</sub>  | 9.46                                      | Excellent conductivity                                               | Not suitable for inkjet printing, and high sintering temperature                                  |
| [9]              | Copper acetate                          | Cyclohexylamine                            | Ethanol/ethylene glycol mixture              | Drop coating      | 230 °C for 60min, N <sub>2</sub>  | 22                                        | Good conductivity,                                                   | Not suitable for inkjet printing and high sintering temperature                                   |
| [10]             | Copper (II) formate hydrate             | Hexylamine                                 | /                                            | Coating           | 250 °C for 2 min with formic acid | 5.2                                       | Excellent conductivity                                               | Not suitable for inkjet printing, high sintering temperature with reductive atmosphere            |
| [11]             | Copper (II) formate tetrahydrate        | 2-amino-2-methyl-1-propanol                | Diethylene glycol methyl ether and n-Butanol | Inkjet printing   | 190°C for 2 min, N <sub>2</sub>   | 10.5                                      | Good conductivity                                                    | /                                                                                                 |
| [12]             | Copper formate/acetate/oleate           | Diethanolamine                             | Ethanol                                      | Inkjet printing   | Intensive Pulsed Light Sintering  | 56                                        | Conductivity                                                         | Need a special sintering method                                                                   |
| [13]             | Copper(II) ethylene glycol carboxylates | /                                          | DI water                                     | Inkjet printing   | 300 °C, 10 min, N <sub>2</sub>    | 66.7 (5 layers on PI)                     | Conductivity                                                         | High sintering temperature                                                                        |
| <b>This work</b> | Copper (II) formate tetrahydrate        | 1,3-Diaminopropane and octylamine          | Methanol                                     | Inkjet printing   | 170°C for 60 min, N <sub>2</sub>  | 127 (1 layer)                             | Excellent stability and printability<br>Certain antioxidant property | Conductivity                                                                                      |

## References

1. R. Singh and G. Kumar, M. *Tech credit seminar report*, 2003, 1-24.
2. W. Xu and T. Wang, *Langmuir*, 2017, **33**, 82-90.
3. J. Lee, B. Lee, S. Jeong, Y. Kim and M. Lee, *Appl. Surf. Sci.*, 2014, **307**, 42-45.
4. B.-Y. Wang, T.-H. Yoo, Y.-W. Song, D.-S. Lim and Y.-J. Oh, *ACS Appl. Mater. Interfaces*, 2013, **5**, 4113-4119.
5. A. Yabuki, N. Arriffin and M. Yanase, *Thin Solid Films*, 2011, **519**, 6530-6533.
6. A. Yabuki, Y. Tachibana and I. W. Fathona, *Mater. Chem. Phys.*, 2014, **148**, 299-304.
7. Y. Dong, Z. Lin, X. Li, Q. Zhu, J.-G. Li and X. Sun, *J. Mater. Chem. C.*, 2018, **6**, 6406-6415.
8. D.-H. Shin, S. Woo, H. Yem, M. Cha, S. Cho, M. Kang, S. Jeong, Y. Kim, K. Kang and Y. Piao, *ACS Appl. Mater. Interfaces*, 2014, **6**, 3312-3319.
9. W.-d. Yang, C.-h. Wang, V. Arrighi, C.-y. Liu and D. Watson, *J. Mater. Sci.: Mater. Electron.*, 2015, **26**, 8973-8982.
10. S. J. Kim, J. Lee, Y.-H. Choi, D.-H. Yeon and Y. Byun, *Thin Solid Films*, 2012, **520**, 2731-2734.
11. Y. Farraj, M. Grouchko and S. Magdassi, *Chem. Commun.*, 2015, **51**, 1587-1590.
12. T. Araki, T. Sugahara, J. Jiu, S. Nagao, M. Nogi, H. Koga, H. Uchida, K. Shinozaki and K. Suganuma, *Langmuir*, 2013, **29**, 11192-11197.
13. D. Adner, F. M. Wolf, S. Möckel, J. Perelaer, U. S. Schubert and H. Lang, *Thin Solid Films*, 2014, **565**, 143-148.
